# Supplementary material
Source: PubMed Central journal article supplement (PMC3431114)

## **Supplementary material:**

- Figure S1: Diagram of the experimental setup
- Figure S2: Timeline of stimuli presentation

**Figure S1:** Diagram of the experimental setup for the food bait, seed pod, and debris tests. The nest entrance is the obstructed black dot in the middle of the diagram. The nest mound is denoted in a dashed line and the range of nest mound radii sized is noted in gray. A single foraging trail is represented by the double dotted line. Food bait is represented in red and is located 15-20 cm from the nest entrance and from the foraging trail. Seed pod is represented in green and is located on the foraging trail 30-70cm from the nest entrance. The 6 toothpicks used in the debris removal experiments are denoted in brown and are obstructing the nest entrance. These stimuli were never presented simultaneously as depicted here.

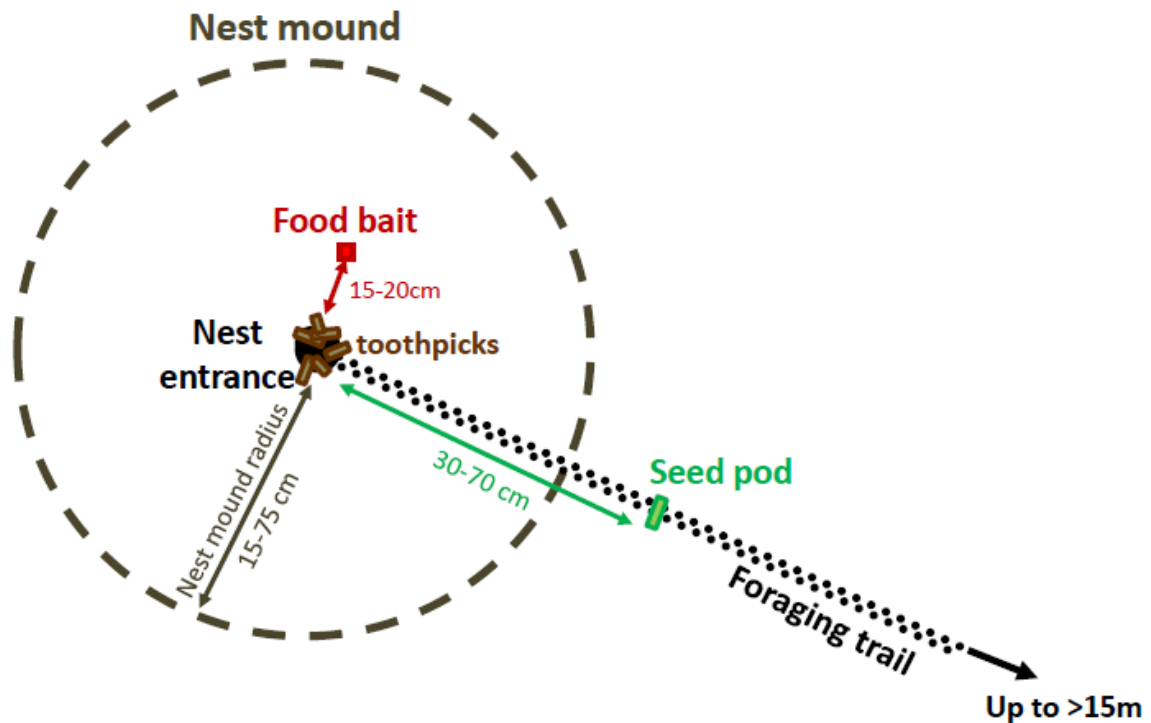

**Figure S2:** Timeline of stimuli presentation. Three trials were conducted in the spring, and three trials in the fall. Each trial is depicted as a small black and gray table. The green squares between trials denote 2-3 days elapsing between each trial. One trial (#4) is magnified bellow showing that each stimulus was presented at least once a day and that each colony was tested only once a day. Rows represent colonies, named according to their color code (r=red, w=white, b=blue, g=green, y=yellow). Columns represent days on which experiments were conducted. The letters in the table denote which stimulus was presented: F=food bait, NP=seed pod, TP=toothpicks, A=alarm. The order in which these stimuli were presented differed among colonies, and was randomly assigned to each colony.

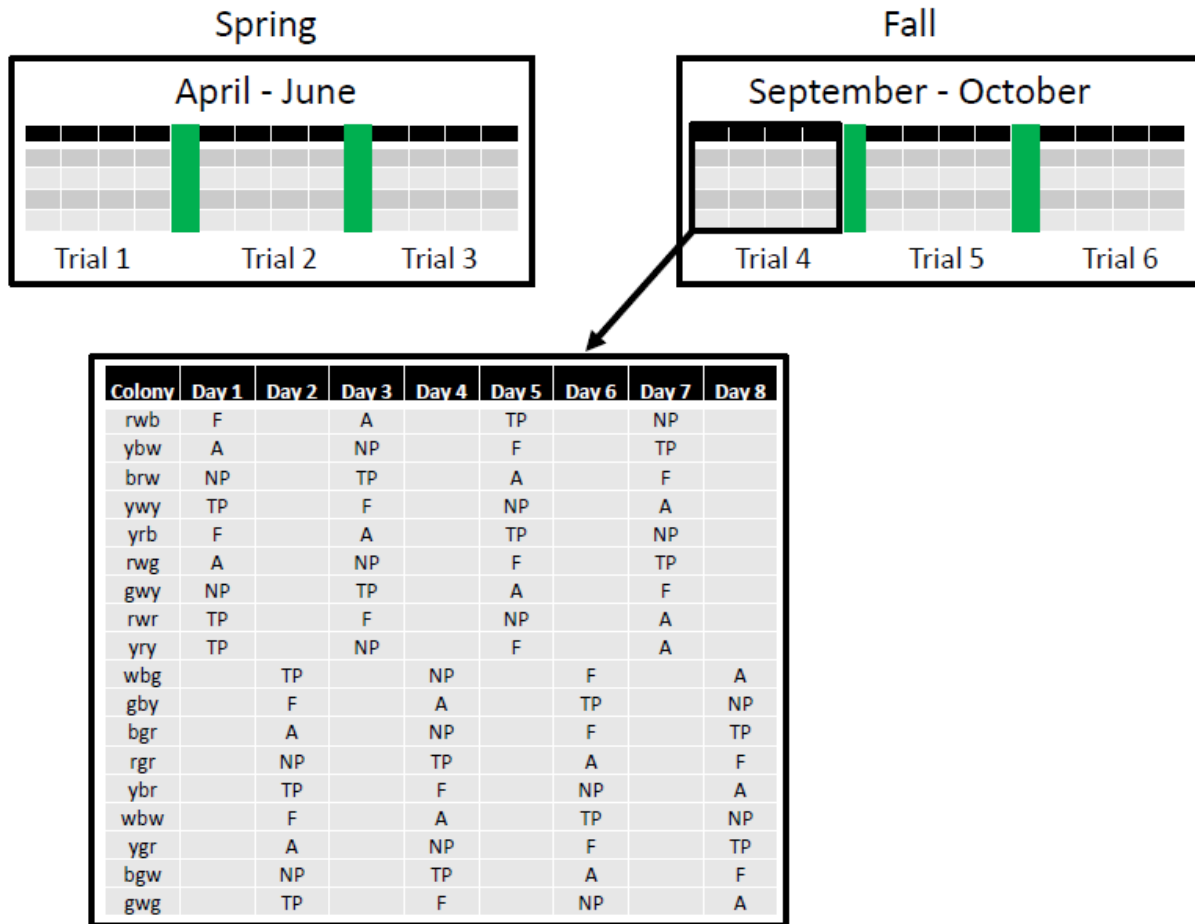

Supplement: supp_ars066_ars066_Supplementary_material.pdf [file supp_ars066_ars066_Supplementary_material.pdf]
